# Supplementary material for: Exploring the potential of end-capping acceptor engineering on indolo[3,2- b ]indole-based small molecules for efficient organic and perovskite solar cells
Source: Royal Society of Chemistry journal article supplement (doi:10.1039/d3ra08639a), 2024-01-01
Supplement: d3ra08639a1.pdf [file d3ra08639a1.pdf]

**“Exploring the Potential of End-capping Acceptor Engineering on indolo[3,2-b]indole-based small molecules for efficient Organic and Perovskite Solar Cells”**

*Waqar Ali Zahid<sup>a</sup>, Muhammad Fiaz Ahmad<sup>b</sup>, Waqas Akram<sup>a</sup>, Rabia Iftikhar<sup>a</sup>, Javed Iqbal<sup>a\*</sup>*

*<sup>a</sup> Department of Chemistry, University of Agriculture, Faisalabad-38000, Pakistan.*

*<sup>b</sup> Department of Chemistry, University of Education, Lahore, Pakistan.*

\*Corresponding author: Email: [javedkhattak79@gmail.com](mailto:javedkhattak79@gmail.com); [Javed.iqbal@uaf.edu.pk](mailto:Javed.iqbal@uaf.edu.pk) (J.I)

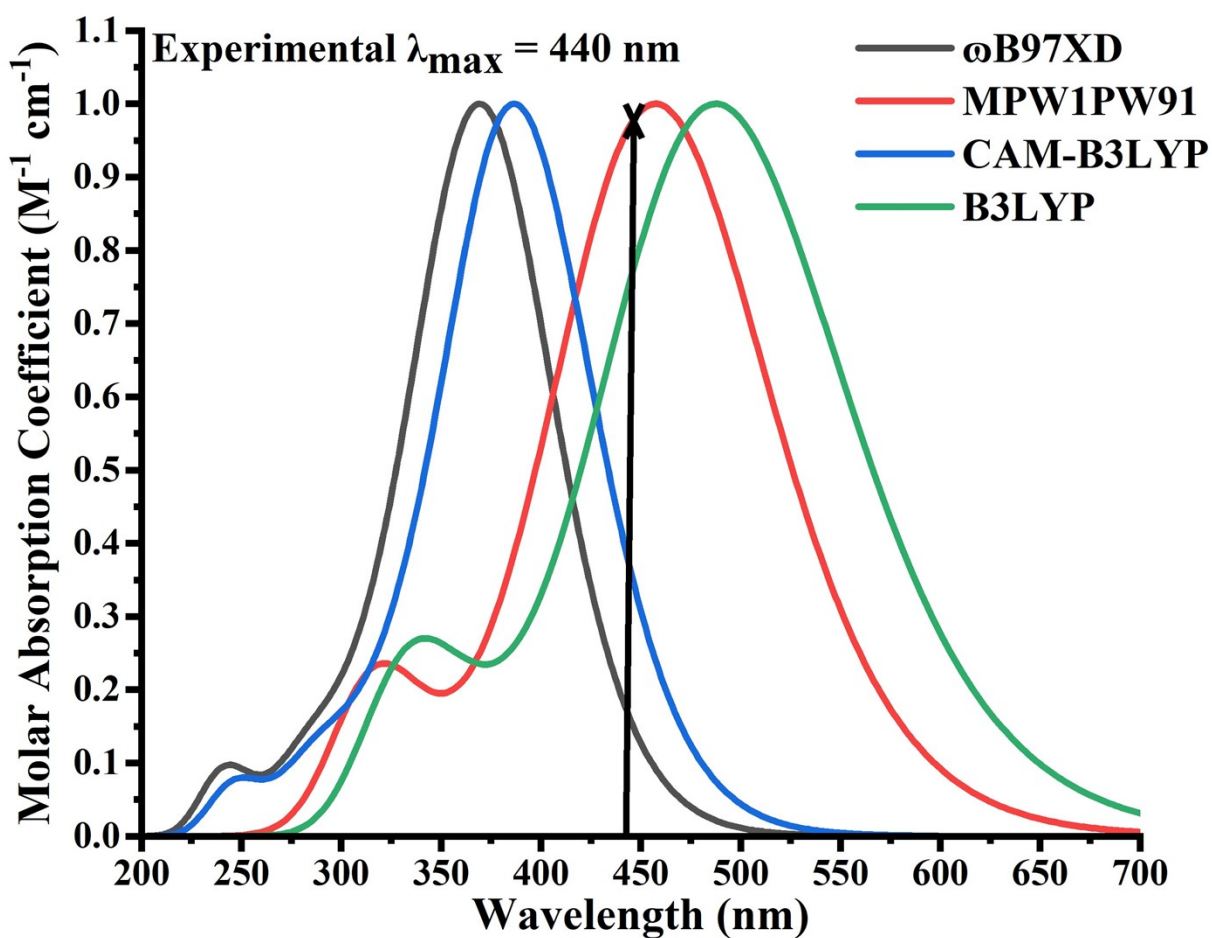

**Figure S1.** Normalized UV-Vis spectra of four different DFT functionals at “6-31G (d, p)” basis set for the reference (IDFR) molecule in solvent (chlorobenzene) phase.

**IDFR**

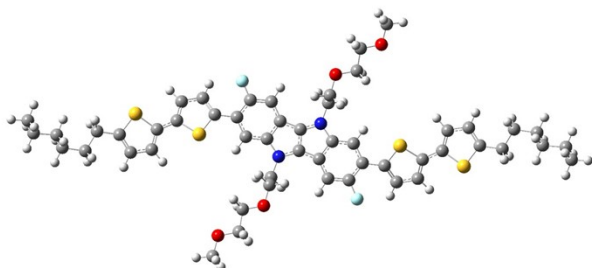

**IDF1**

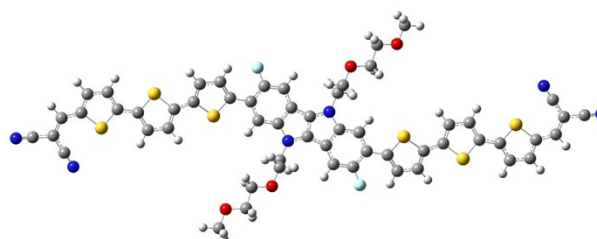

**IDF2**

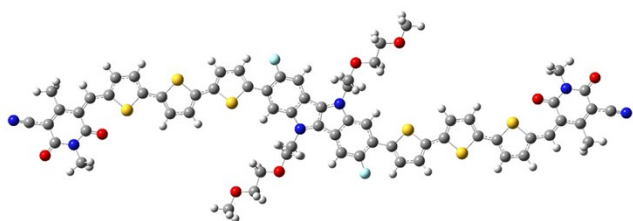

**IDF3**

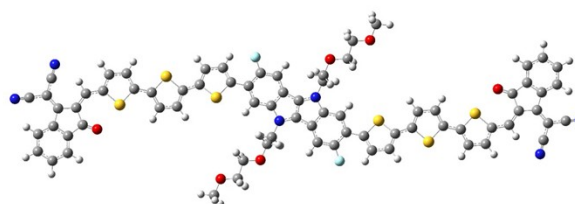

**IDF4**

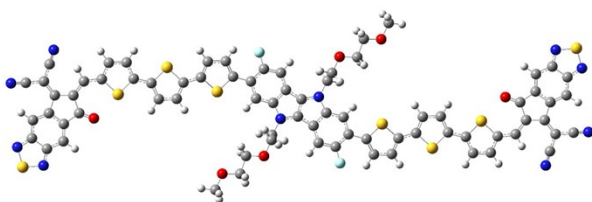

**IDF5**

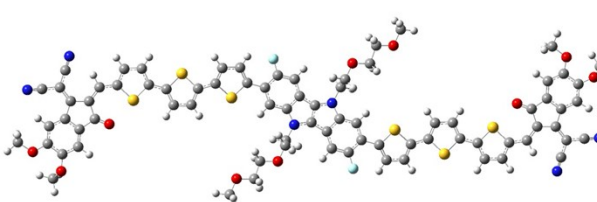

**IDF6**

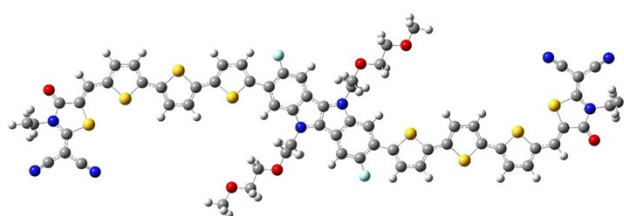

**Spiro-OMeTAD**

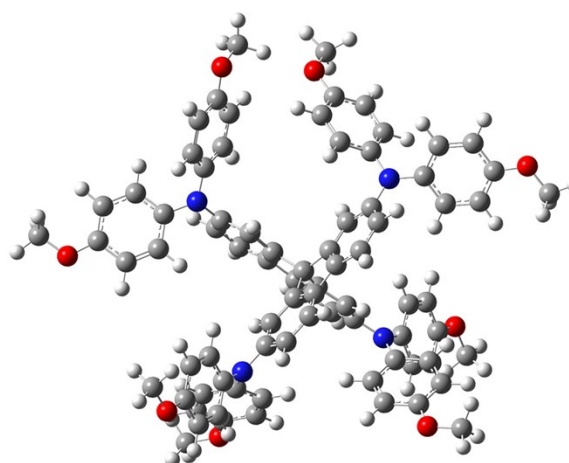

**Figure S2.** Optimized geometries of **IDFR**, **IDF1-IDF6**, and **Spiro-OMeTAD** molecules.

**Table S1.** Charge transfer length ( $D_{CT}$ ), electronic coupling parameter (H index), Charge separation parameter (t index), maximum intrinsic charge transfer (CT) and minimum intrinsic local excitation (LE) of investigated molecules.

| Molecules           | $D_{CT}$ (Å) | H Index | t index | CT (%) | LE (%) |
|---------------------|--------------|---------|---------|--------|--------|
| <b>IDFR</b>         | 0.026577     | 6.560   | -0.841  | 51.471 | 48.529 |
| <b>IDF1</b>         | 0.060308     | 10.644  | -8.114  | 66.771 | 33.229 |
| <b>IDF2</b>         | 0.212426     | 11.780  | -11.075 | 69.446 | 30.554 |
| <b>IDF3</b>         | 0.203775     | 12.685  | -12.031 | 76.754 | 23.246 |
| <b>IDF4</b>         | 0.104316     | 13.136  | -8.811  | 81.374 | 18.626 |
| <b>IDF5</b>         | 14.068894    | 12.427  | -8.128  | 75.714 | 24.286 |
| <b>IDF6</b>         | 1.551828     | 16.218  | -13.608 | 62.437 | 37.563 |
| <b>Spiro-OMeTAD</b> | 1.690645     | 4.951   | -1.613  | 66.235 | 33.765 |

**Table S2.** Cartesian coordinates of the optimized structure of **IDFR** (reference) molecule at the “MPW1PW91/6-31G (d,p)” level of theory.

|   |          |          |          |
|---|----------|----------|----------|
| C | -3.17127 | 2.61978  | -0.4553  |
| C | -3.8647  | 1.42105  | -0.79487 |
| C | -3.2517  | 0.16175  | -0.61146 |
| C | -1.96814 | 0.15419  | -0.08969 |
| C | -1.316   | 1.32989  | 0.2331   |
| C | -1.89737 | 2.57933  | 0.05071  |
| H | -3.75552 | -0.74804 | -0.86318 |
| H | -1.37093 | 3.476    | 0.29861  |
| C | 1.91983  | -2.04042 | 1.29183  |
| C | 3.19763  | -2.06994 | 1.79538  |
| C | 3.86438  | -0.86103 | 2.16963  |
| C | 3.23697  | 0.38571  | 1.99294  |
| C | 1.9512   | 0.38068  | 1.48764  |
| H | 1.41005  | -2.9404  | 1.01893  |
| H | 3.73213  | 1.29943  | 2.24246  |
| N | -1.07307 | -0.9869  | 0.2287   |
| N | 1.03575  | 1.51317  | 1.22409  |
| C | -0.06903 | 0.9477   | 0.72562  |
| C | 0.04949  | -0.41956 | 0.68872  |
| C | 1.31128  | -0.79766 | 1.1494   |
| C | -7.70504 | 1.10688  | -1.97435 |
| C | -7.36154 | 2.42412  | -1.94019 |
| S | -6.27498 | 0.09214  | -1.79396 |
| C | -5.99525 | 2.64505  | -1.59489 |
| H | -8.05204 | 3.21579  | -2.14139 |
| C | -5.29666 | 1.49361  | -1.36202 |
| H | -5.56226 | 3.61874  | -1.51238 |
| C | 7.63818  | -0.44912 | 3.55864  |
| C | 7.33167  | -1.77408 | 3.48408  |
| C | 5.99937  | -2.03099 | 3.04151  |
| C | 5.27902  | -0.89949 | 2.78518  |

|   |           |          |          |
|---|-----------|----------|----------|
| S | 6.19803   | 0.529    | 3.26538  |
| H | 8.02905   | -2.54809 | 3.72799  |
| H | 5.60696   | -3.01755 | 2.91352  |
| C | 8.92014   | 0.06046  | 3.82921  |
| C | 9.25421   | 1.42967  | 3.85323  |
| S | 10.3408   | -0.92284 | 4.20249  |
| C | 10.56676  | 1.67864  | 4.3398   |
| H | 8.5826    | 2.20365  | 3.54971  |
| C | 11.25438  | 0.50403  | 4.7066   |
| H | 10.98372  | 2.65837  | 4.43104  |
| C | -9.0072   | 0.61255  | -2.1227  |
| C | -9.33017  | -0.75581 | -2.16371 |
| C | -10.68476 | -0.99999 | -2.50116 |
| C | -11.42319 | 0.1773   | -2.7204  |
| S | -10.46476 | 1.5983   | -2.29147 |
| H | -8.62206  | -1.53271 | -1.97023 |
| H | -11.1011  | -1.98173 | -2.5919  |
| C | 1.31173   | 2.9306   | 1.47907  |
| C | 0.89154   | 3.24914  | 2.92558  |
| C | 2.60128   | 4.80971  | 3.13272  |
| C | 2.94043   | 6.25122  | 3.55477  |
| C | 4.64786   | 7.78419  | 3.9257   |
| O | 1.18869   | 4.60976  | 3.23228  |
| O | 4.35109   | 6.45975  | 3.47583  |
| H | 2.35707   | 3.11962  | 1.35982  |
| H | 0.76121   | 3.54302  | 0.79427  |
| H | 1.42927   | 2.61398  | 3.59969  |
| H | -0.15863  | 3.07793  | 3.03472  |
| H | 3.10442   | 4.12232  | 3.78008  |
| H | 2.91698   | 4.64315  | 2.12382  |
| H | 2.61611   | 6.40822  | 4.56081  |
| H | 2.44178   | 6.94083  | 2.90656  |
| H | 5.7026    | 7.95151  | 3.87085  |
| H | 4.14079   | 8.4943   | 3.30631  |
| H | 4.32048   | 7.89751  | 4.93876  |
| F | 3.82792   | -3.25528 | 1.93778  |
| F | -3.77929  | 3.81152  | -0.63336 |
| C | -1.38466  | -2.41109 | 0.0702   |
| C | -2.0694   | -2.90194 | 1.35988  |
| C | -3.34684  | -4.37902 | 0.11973  |
| C | -3.83871  | -5.83284 | -0.01977 |
| C | -5.1986   | -7.26601 | -1.29248 |
| O | -2.44245  | -4.27346 | 1.22098  |
| O | -4.72668  | -5.92332 | -1.1398  |
| H | -2.04719  | -2.5417  | -0.75895 |
| H | -0.48701  | -2.96803 | -0.10384 |
| H | -2.94906  | -2.31752 | 1.53658  |
| H | -1.39615  | -2.79313 | 2.18255  |
| H | -4.18587  | -3.73641 | 0.28665  |
| H | -2.84446  | -4.08426 | -0.77741 |
| H | -4.35318  | -6.12364 | 0.87209  |

|   |           |          |          |
|---|-----------|----------|----------|
| H | -3.0031   | -6.48211 | -0.17504 |
| H | -5.83388  | -7.32202 | -2.15101 |
| H | -4.36559  | -7.92456 | -1.42077 |
| H | -5.74928  | -7.55375 | -0.42178 |
| C | -12.86257 | 0.20419  | -3.26702 |
| C | -13.05992 | -0.99091 | -4.22061 |
| C | -15.4891  | -1.1164  | -3.59688 |
| C | -16.93228 | -1.10157 | -4.13308 |
| H | -13.55519 | 0.13593  | -2.45416 |
| H | -13.02913 | 1.11611  | -3.8001  |
| H | -12.88462 | -1.90304 | -3.69063 |
| H | -12.36936 | -0.91121 | -5.03342 |
| H | -15.30936 | -2.03645 | -3.07939 |
| H | -15.35276 | -0.29689 | -2.92291 |
| H | -17.07525 | -1.9246  | -4.80286 |
| H | -17.10939 | -0.18439 | -4.65371 |
| C | -14.49888 | -0.98546 | -4.76828 |
| C | -17.91605 | -1.2203  | -2.95398 |
| H | -14.63021 | -1.80873 | -5.44047 |
| H | -14.67912 | -0.06907 | -5.28997 |
| H | -17.74196 | -2.13947 | -2.43461 |
| H | -17.76873 | -0.39933 | -2.28314 |
| H | -18.91929 | -1.2037  | -3.32334 |
| C | 12.60191  | 0.47233  | 5.45439  |
| C | 13.61035  | 1.63401  | 5.34593  |
| C | 15.49697  | 0.00094  | 5.06878  |
| C | 16.6998   | -0.41938 | 4.1987   |
| H | 12.91569  | -0.44202 | 5.91387  |
| H | 12.9772   | 0.16773  | 4.49812  |
| H | 13.98453  | 1.87126  | 6.32126  |
| H | 13.12022  | 2.49059  | 4.93345  |
| H | 15.8426   | 0.25943  | 6.04636  |
| H | 14.80373  | -0.81249 | 5.13663  |
| H | 17.39272  | 0.39289  | 4.12982  |
| H | 16.35864  | -0.68183 | 3.21981  |
| C | 14.78866  | 1.2212   | 4.44272  |
| C | 17.40062  | -1.63501 | 4.83841  |
| H | 15.48028  | 2.03473  | 4.3657   |
| H | 14.42828  | 0.96916  | 3.46748  |
| H | 17.74537  | -1.37336 | 5.81596  |
| H | 16.70859  | -2.44848 | 4.90976  |
| H | 18.23293  | -1.9281  | 4.23272  |

---

**Table S3.** Cartesian coordinates of the optimized structure of **IDF1** molecule at the “MPW1PW91/6-31G (d,p)” level of theory.

|   |          |         |          |
|---|----------|---------|----------|
| C | -3.02278 | 2.79013 | -0.58456 |
| C | -3.93969 | 1.67571 | -0.61434 |
| C | -3.44016 | 0.36989 | -0.54097 |

|   |           |          |          |
|---|-----------|----------|----------|
| C | -2.07258  | 0.19408  | -0.47829 |
| C | -1.19289  | 1.25945  | -0.4434  |
| C | -1.65009  | 2.58214  | -0.49909 |
| H | -4.10099  | -0.46761 | -0.54992 |
| H | -0.96391  | 3.40581  | -0.46911 |
| C | 1.72316   | -2.59343 | -0.22083 |
| C | 3.09259   | -2.80431 | -0.11141 |
| C | 4.00965   | -1.69519 | -0.0801  |
| C | 3.51422   | -0.38336 | -0.15669 |
| C | 2.14658   | -0.20422 | -0.234   |
| H | 1.03716   | -3.41582 | -0.25687 |
| H | 4.17727   | 0.45319  | -0.15018 |
| N | -1.31462  | -1.07001 | -0.42128 |
| N | 1.38313   | 1.06006  | -0.26695 |
| C | 0.09045   | 0.68318  | -0.36206 |
| C | -0.01759  | -0.69554 | -0.36031 |
| C | 1.26634   | -1.27062 | -0.27038 |
| C | -8.05235  | 1.58595  | -0.5788  |
| C | -7.60808  | 2.83059  | -0.98149 |
| S | -6.64764  | 0.50103  | -0.48808 |
| C | -6.17089  | 2.96736  | -1.04134 |
| H | -8.2694   | 3.63243  | -1.22659 |
| C | -5.4913   | 1.82911  | -0.72813 |
| H | -5.67698  | 3.8813   | -1.30388 |
| C | 8.11271   | -1.57184 | 0.03193  |
| C | 7.67718   | -2.83464 | 0.40111  |
| C | 6.23806   | -2.99091 | 0.39752  |
| C | 5.5561    | -1.85458 | 0.06448  |
| S | 6.69945   | -0.52242 | -0.1622  |
| H | 8.33965   | -3.6305  | 0.67021  |
| H | 5.74441   | -3.91171 | 0.63885  |
| C | 9.46678   | -1.10899 | -0.18246 |
| C | 9.77858   | 0.23178  | -0.50781 |
| S | 10.99083  | -2.02455 | -0.08729 |
| C | 11.18804  | 0.54438  | -0.52302 |
| H | 9.0197    | 0.95586  | -0.71759 |
| C | 12.02773  | -0.56766 | -0.25935 |
| H | 11.55894  | 1.52579  | -0.72206 |
| C | -9.42258  | 1.19504  | -0.28746 |
| C | -9.82856  | -0.13752 | -0.03341 |
| C | -11.23213 | -0.29567 | 0.29393  |
| C | -11.9693  | 0.92895  | 0.34664  |
| S | -10.87296 | 2.2408   | -0.202   |
| H | -9.14164  | -0.96044 | -0.07078 |
| H | -11.66841 | -1.2548  | 0.48434  |
| C | 1.96101   | 2.41298  | -0.19328 |
| C | 1.96626   | 2.84435  | 1.29137  |
| C | 3.92138   | 4.21933  | 1.33379  |
| C | 4.3855    | 5.67661  | 1.55028  |
| C | 6.24146   | 7.09093  | 1.7437   |
| O | 2.49399   | 4.17044  | 1.45518  |

|   |           |          |          |
|---|-----------|----------|----------|
| O | 5.81421   | 5.7436   | 1.50591  |
| H | 2.96009   | 2.40447  | -0.57989 |
| H | 1.36765   | 3.09396  | -0.76287 |
| H | 2.55968   | 2.15988  | 1.86306  |
| H | 0.95801   | 2.83048  | 1.64234  |
| H | 4.36001   | 3.5912   | 2.08228  |
| H | 4.22474   | 3.88085  | 0.36554  |
| H | 4.04798   | 6.0164   | 2.50763  |
| H | 3.97222   | 6.2995   | 0.78435  |
| H | 7.31072   | 7.1333   | 1.72934  |
| H | 5.84856   | 7.72958  | 0.98098  |
| H | 5.88537   | 7.41704  | 2.69975  |
| F | 3.5647    | -4.06822 | -0.04079 |
| F | -3.49682  | 4.0537   | -0.64299 |
| C | 17.70373  | -0.53988 | -0.25479 |
| C | 18.66734  | 0.41292  | -0.48276 |
| H | 18.11356  | -1.51559 | -0.13926 |
| C | 18.49835  | 1.7704   | -0.76001 |
| C | 19.99503  | -0.05998 | -0.42447 |
| N | 21.06656  | -0.46814 | -0.37284 |
| N | 18.44226  | 2.8968   | -0.99491 |
| C | -17.54969 | 0.78325  | 0.65813  |
| C | -18.42202 | -0.2865  | 0.58256  |
| H | -18.03849 | 1.71297  | 0.51407  |
| C | -18.16428 | -1.6575  | 0.38928  |
| C | -19.77181 | 0.05961  | 0.71957  |
| N | -20.87731 | 0.34304  | 0.83179  |
| N | -18.05812 | -2.7922  | 0.23131  |
| C | -1.91321  | -2.41532 | -0.43294 |
| C | -2.14146  | -2.83622 | 1.03372  |
| C | -4.12226  | -4.14295 | 0.8118   |
| C | -4.66221  | -5.5843  | 0.93567  |
| C | -6.57729  | -6.9296  | 0.83941  |
| O | -2.72224  | -4.14619 | 1.12225  |
| O | -6.07363  | -5.59531 | 0.69878  |
| H | -2.84606  | -2.3954  | -0.96042 |
| H | -1.25351  | -3.10727 | -0.9104  |
| H | -2.79443  | -2.13395 | 1.51094  |
| H | -1.19445  | -2.84323 | 1.52521  |
| H | -4.63485  | -3.50984 | 1.50767  |
| H | -4.2822   | -3.77994 | -0.18142 |
| H | -4.46872  | -5.95148 | 1.92242  |
| H | -4.17231  | -6.21045 | 0.21941  |
| H | -7.63569  | -6.92937 | 0.68059  |
| H | -6.10824  | -7.56537 | 0.11847  |
| H | -6.36561  | -7.29151 | 1.8249   |
| C | 13.61471  | -0.6165  | -0.12151 |
| C | 14.20942  | -1.81987 | -0.03178 |
| C | 15.74187  | -1.7628  | -0.0576  |
| C | 16.26702  | -0.53499 | -0.15272 |
| S | 14.91257  | 0.6723   | -0.09268 |



|   |           |          |          |
|---|-----------|----------|----------|
| H | 13.66679  | -2.73249 | 0.04667  |
| H | 16.35622  | -2.63667 | -0.03368 |
| C | -13.50335 | 1.10405  | 0.78379  |
| C | -14.11521 | 2.30971  | 1.05552  |
| C | -15.66542 | 2.17938  | 1.1104   |
| C | -16.13921 | 0.91946  | 0.88762  |
| S | -14.74705 | -0.20928 | 0.98506  |
| H | -13.6053  | 3.24824  | 1.19638  |
| H | -16.31671 | 3.01347  | 1.30962  |

**Table S4.** Cartesian coordinates of the optimized structure of **IDF2** molecule at the “MPW1PW91/6-31G (d,p)” level of theory.

---

|   |          |          |          |
|---|----------|----------|----------|
| C | 2.99238  | -2.82686 | -0.57621 |
| C | 3.8959   | -1.72948 | -0.64727 |
| C | 3.42695  | -0.41455 | -0.61068 |
| C | 2.06871  | -0.229   | -0.49299 |
| C | 1.1813   | -1.28529 | -0.40777 |
| C | 1.63205  | -2.61452 | -0.44543 |
| H | 4.09819  | 0.41562  | -0.67366 |
| H | 0.95551  | -3.43855 | -0.37039 |
| C | -1.69327 | 2.60731  | -0.14232 |
| C | -3.05208 | 2.82367  | -0.00169 |
| C | -3.95738 | 1.7285   | 0.0706   |
| C | -3.48967 | 0.41151  | 0.02217  |
| C | -2.13221 | 0.22201  | -0.09946 |
| H | -1.01465 | 3.42981  | -0.2083  |
| H | -4.16185 | -0.41976 | 0.09003  |
| N | 1.32957  | 1.04127  | -0.43595 |
| N | -1.39203 | -1.04901 | -0.15239 |
| C | -0.09548 | -0.69253 | -0.28673 |
| C | 0.03209  | 0.68503  | -0.30826 |
| C | -1.24436 | 1.27748  | -0.18584 |
| C | 7.92344  | -1.65057 | -0.71412 |
| C | 7.50419  | -2.89685 | -1.12203 |
| S | 6.54103  | -0.64614 | -0.31151 |
| C | 6.07967  | -3.05344 | -1.13259 |
| H | 8.1754   | -3.67427 | -1.41707 |
| C | 5.41601  | -1.92694 | -0.74357 |
| H | 5.58745  | -3.95984 | -1.42547 |
| C | -7.99707 | 1.64631  | 0.21735  |
| C | -7.56128 | 2.88784  | 0.63064  |
| C | -6.13409 | 3.04597  | 0.60308  |
| C | -5.47724 | 1.91779  | 0.20827  |
| S | -6.61196 | 0.61136  | -0.11559 |
| H | -8.22243 | 3.66832  | 0.93606  |
| H | -5.63418 | 3.95326  | 0.88474  |
| C | -9.35246 | 1.22485  | 0.06042  |
| C | -9.7446  | -0.06802 | -0.16997 |

|   |           |          |          |
|---|-----------|----------|----------|
| S | -10.78408 | 2.26177  | 0.12898  |
| C | -11.18258 | -0.25318 | -0.25629 |
| H | -9.0403   | -0.87739 | -0.26014 |
| C | -11.92299 | 0.90597  | -0.11076 |
| H | -11.6212  | -1.20981 | -0.42528 |
| C | 9.26541   | -1.2131  | -0.6102  |
| C | 9.65591   | 0.07295  | -0.34488 |
| C | 11.08196  | 0.24082  | -0.23254 |
| C | 11.79846  | -0.91641 | -0.42462 |
| S | 10.68029  | -2.26101 | -0.71812 |
| H | 8.95853   | 0.88073  | -0.22625 |
| H | 11.53663  | 1.18784  | -0.03506 |
| C | -2.00132  | -2.3829  | -0.06148 |
| C | -1.98891  | -2.80856 | 1.42304  |
| C | -3.94282  | -4.18301 | 1.5293   |
| C | -4.37294  | -5.63706 | 1.77799  |
| C | -6.24874  | -7.03582 | 2.02479  |
| O | -2.51693  | -4.12839 | 1.59634  |
| O | -5.79969  | -5.70125 | 1.77308  |
| H | -3.00743  | -2.35242 | -0.43178 |
| H | -1.4324   | -3.07541 | -0.64008 |
| H | -2.57202  | -2.11857 | 2.00074  |
| H | -0.97831  | -2.80391 | 1.76023  |
| H | -4.35728  | -3.55172 | 2.28977  |
| H | -4.28984  | -3.85778 | 0.57084  |
| H | -4.00193  | -5.9626  | 2.7293   |
| H | -3.97657  | -6.2668  | 1.00742  |
| H | -7.31759  | -7.04933 | 2.01885  |
| H | -5.87482  | -7.68745 | 1.26235  |
| H | -5.88999  | -7.36202 | 2.98067  |
| F | -3.5327   | 4.08115  | 0.06417  |
| F | 3.47664   | -4.08574 | -0.62492 |
| C | 1.94694   | 2.37321  | -0.49978 |
| C | 2.26912   | 2.81724  | 0.94356  |
| C | 4.20897   | 4.16708  | 0.58047  |
| C | 4.70195   | 5.61771  | 0.70097  |
| C | 6.59819   | 6.99327  | 0.47552  |
| O | 2.83512   | 4.13286  | 0.9743   |
| O | 6.08951   | 5.66086  | 0.36434  |
| H | 2.84615   | 2.33202  | -1.08287 |
| H | 1.2659    | 3.06154  | -0.94791 |
| H | 2.96127   | 2.12766  | 1.38588  |
| H | 1.35998   | 2.82794  | 1.49865  |
| H | 4.78047   | 3.53905  | 1.23444  |
| H | 4.32225   | 3.82562  | -0.42729 |
| H | 4.56542   | 5.96036  | 1.70727  |
| H | 4.14515   | 6.24371  | 0.03363  |
| H | 7.63676   | 6.99073  | 0.22229  |
| H | 6.06447   | 7.6353   | -0.1944  |
| H | 6.47377   | 7.34357  | 1.48075  |
| C | -13.37697 | 1.10129  | -0.13371 |

|   |           |          |          |
|---|-----------|----------|----------|
| C | -13.9093  | 2.35152  | 0.21415  |
| C | -15.30411 | 2.4837   | 0.05422  |
| C | -16.00947 | 1.41265  | -0.48044 |
| S | -14.79397 | 0.01444  | -0.56046 |
| H | -13.30275 | 3.16292  | 0.55006  |
| H | -15.82948 | 3.36681  | 0.33554  |
| C | 13.22005  | -1.08706 | -0.39754 |
| C | 13.81849  | -2.34063 | -0.63411 |
| C | 15.23017  | -2.32228 | -0.64565 |
| C | 15.81627  | -1.07509 | -0.45966 |
| S | 14.5125   | 0.11716  | -0.0565  |
| H | 13.25695  | -3.2303  | -0.8113  |
| H | 15.82525  | -3.19847 | -0.7843  |
| C | 17.25003  | -0.97954 | -0.62318 |
| C | 18.04226  | 0.10943  | -0.43128 |
| C | 17.44784  | 1.47866  | -0.12797 |
| C | 19.5862   | -0.0069  | -0.52312 |
| C | 20.35352  | 1.09884  | -0.38339 |
| C | 19.69328  | 2.46418  | -0.06351 |
| O | 20.36351  | 3.51624  | -0.20567 |
| O | 16.22612  | 1.67783  | -0.32631 |
| C | 20.2746   | -1.37003 | -0.79625 |
| C | 21.75489  | 1.03223  | -0.46715 |
| H | 19.85954  | -2.11607 | -0.14671 |
| H | 20.10483  | -1.65287 | -1.81249 |
| H | 21.32493  | -1.28047 | -0.61673 |
| H | 17.76613  | -1.88536 | -0.90587 |
| N | 22.90303  | 0.97766  | -0.53578 |
| N | 18.30538  | 2.53761  | 0.43066  |
| C | 17.6908   | 3.82676  | 0.12119  |
| H | 16.8242   | 3.93339  | 0.72524  |
| H | 18.39102  | 4.61028  | 0.34009  |
| H | 17.41877  | 3.88543  | -0.90927 |
| C | -17.43875 | 1.79794  | -0.77527 |
| C | -18.65888 | 1.19511  | -1.21951 |
| C | -18.83321 | -0.222   | -1.79135 |
| C | -19.99663 | 2.05438  | -1.12923 |
| C | -21.19647 | 1.54504  | -1.54918 |
| C | -21.2845  | 0.10014  | -2.05886 |
| O | -22.32305 | -0.27166 | -2.67754 |
| O | -17.83631 | -0.85325 | -2.19902 |
| C | -20.01055 | 3.50562  | -0.59381 |
| C | -22.39654 | 2.29139  | -1.44835 |
| H | -19.45802 | 3.55603  | 0.32153  |
| H | -19.56667 | 4.15405  | -1.31478 |
| H | -21.02647 | 3.80737  | -0.41782 |
| H | -17.59417 | 2.74888  | -0.58854 |
| N | -23.40196 | 2.86134  | -1.40377 |
| N | -20.18994 | -0.86017 | -1.81519 |
| C | -20.18919 | -1.9151  | -2.8266  |
| H | -19.5915  | -2.71363 | -2.46813 |

|   |           |          |          |
|---|-----------|----------|----------|
| H | -21.19813 | -2.25148 | -2.98516 |
| H | -19.79707 | -1.55963 | -3.75353 |

**Table S5.** Cartesian coordinates of the optimized structure of **IDF3** molecule at the “MPW1PW91/6-31G (d,p)” level of theory.

---

|   |           |          |          |
|---|-----------|----------|----------|
| C | 2.96557   | -2.82888 | -0.60494 |
| C | 3.89644   | -1.72164 | -0.6609  |
| C | 3.42064   | -0.41161 | -0.56854 |
| C | 2.06279   | -0.21768 | -0.47765 |
| C | 1.17244   | -1.27549 | -0.42148 |
| C | 1.60399   | -2.60252 | -0.47793 |
| H | 4.09464   | 0.41446  | -0.57206 |
| H | 0.90508   | -3.41748 | -0.4246  |
| C | -1.66901  | 2.59331  | -0.12324 |
| C | -3.02962  | 2.81913  | 0.0261   |
| C | -3.96407  | 1.71216  | 0.08465  |
| C | -3.48647  | 0.40163  | -0.01783 |
| C | -2.12732  | 0.20824  | -0.12323 |
| H | -0.9707   | 3.40926  | -0.17805 |
| H | -4.15853  | -0.4255  | -0.00467 |
| N | 1.3189    | 1.05626  | -0.41965 |
| N | -1.37799  | -1.06526 | -0.16388 |
| C | -0.0923   | -0.69238 | -0.30098 |
| C | 0.02898   | 0.68493  | -0.31112 |
| C | -1.23728  | 1.26732  | -0.19118 |
| C | 7.97546   | -1.61458 | -0.81643 |
| C | 7.54065   | -2.88095 | -1.11873 |
| S | 6.58486   | -0.52193 | -0.76136 |
| C | 6.11216   | -3.0322  | -1.08812 |
| H | 8.20292   | -3.68526 | -1.34946 |
| C | 5.43765   | -1.87618 | -0.83948 |
| H | 5.61826   | -3.96674 | -1.24143 |
| C | -8.06915  | 1.63112  | 0.28247  |
| C | -7.60996  | 2.89253  | 0.58974  |
| C | -6.17393  | 3.03065  | 0.54911  |
| C | -5.5088   | 1.8731   | 0.28054  |
| S | -6.67628  | 0.53429  | 0.19744  |
| H | -8.25757  | 3.70413  | 0.82928  |
| H | -5.66915  | 3.95978  | 0.71098  |
| C | -9.43591  | 1.23288  | 0.04705  |
| C | -9.81636  | -0.05089 | -0.22644 |
| S | -10.88202 | 2.25993  | 0.04545  |
| C | -11.24268 | -0.26991 | -0.32069 |
| H | -9.09988  | -0.82982 | -0.35207 |
| C | -11.99236 | 0.87213  | -0.13919 |
| H | -11.66515 | -1.23808 | -0.5084  |
| C | 9.3224    | -1.22065 | -0.57122 |
| C | 9.71686   | 0.05625  | -0.28607 |

|   |           |          |          |
|---|-----------|----------|----------|
| C | 11.14192  | 0.24814  | -0.21394 |
| C | 11.85042  | -0.91265 | -0.4051  |
| S | 10.73082  | -2.27846 | -0.57316 |
| H | 9.01506   | 0.84426  | -0.13693 |
| H | 11.59202  | 1.20451  | -0.0278  |
| C | -1.95264  | -2.42392 | -0.04589 |
| C | -1.92248  | -2.82784 | 1.45163  |
| C | -3.90291  | -4.17796 | 1.51688  |
| C | -4.41024  | -5.62792 | 1.7682   |
| C | -6.25072  | -7.0352  | 2.00694  |
| O | -2.46932  | -4.14827 | 1.65101  |
| O | -5.84149  | -5.68583 | 1.72145  |
| H | -2.96165  | -2.42738 | -0.40666 |
| H | -1.37168  | -3.11581 | -0.61755 |
| H | -2.49123  | -2.12486 | 2.02622  |
| H | -0.90315  | -2.81873 | 1.77765  |
| H | -4.33471  | -3.51866 | 2.24257  |
| H | -4.18553  | -3.86011 | 0.53563  |
| H | -4.08841  | -5.94911 | 2.73618  |
| H | -4.00717  | -6.27711 | 1.01967  |
| H | -7.3195   | -7.09547 | 2.01443  |
| H | -5.8626   | -7.69174 | 1.25631  |
| H | -5.87214  | -7.32741 | 2.96576  |
| F | -3.46967  | 4.091    | 0.12143  |
| F | 3.41005   | -4.10133 | -0.67369 |
| C | 1.91208   | 2.40962  | -0.46103 |
| C | 2.20929   | 2.84202  | 0.99004  |
| C | 4.16475   | 4.16307  | 0.57838  |
| C | 4.73325   | 5.60838  | 0.68194  |
| C | 6.59519   | 6.99172  | 0.45896  |
| O | 2.79921   | 4.15736  | 1.03744  |
| O | 6.11552   | 5.64405  | 0.30419  |
| H | 2.82051   | 2.39441  | -1.0309  |
| H | 1.22592   | 3.09509  | -0.91426 |
| H | 2.88374   | 2.14178  | 1.44065  |
| H | 1.28614   | 2.8517   | 1.5301   |
| H | 4.74377   | 3.50702  | 1.19671  |
| H | 4.21102   | 3.82744  | -0.43615 |
| H | 4.6478    | 5.94734  | 1.69273  |
| H | 4.17539   | 6.25334  | 0.0363   |
| H | 7.63734   | 7.03498  | 0.21785  |
| H | 6.05147   | 7.64094  | -0.19534 |
| H | 6.45221   | 7.30707  | 1.47288  |
| C | -13.42928 | 1.02498  | -0.10194 |
| C | -13.98737 | 2.27633  | 0.18052  |
| C | -15.38664 | 2.35249  | -0.03088 |
| C | -16.01478 | 1.14691  | -0.42123 |
| S | -14.77195 | -0.15523 | -0.38685 |
| H | -13.40204 | 3.10952  | 0.51971  |
| H | -15.9298  | 3.26108  | 0.08952  |
| C | 13.25396  | -1.11828 | -0.45914 |

|   |           |          |          |
|---|-----------|----------|----------|
| C | 13.73667  | -2.42095 | -0.56857 |
| C | 15.14454  | -2.5223  | -0.53835 |
| C | 15.8253   | -1.29097 | -0.45849 |
| S | 14.62469  | 0.03445  | -0.34362 |
| H | 13.08578  | -3.26856 | -0.66569 |
| H | 15.64985  | -3.4572  | -0.58226 |
| C | 17.25712  | -1.25103 | -0.49196 |
| C | 18.03315  | -0.14708 | -0.70854 |
| C | 17.63031  | 1.29988  | -1.05183 |
| C | 19.57455  | -0.1531  | -0.67313 |
| C | 18.94346  | 2.08523  | -1.29882 |
| C | 20.0409   | 1.26507  | -1.06854 |
| C | 21.34508  | 1.73677  | -1.19911 |
| C | 21.5303   | 3.07415  | -1.60277 |
| C | 20.41518  | 3.91066  | -1.85555 |
| C | 19.10163  | 3.41525  | -1.69991 |
| H | 22.184    | 1.10502  | -1.00169 |
| H | 22.52103  | 3.46043  | -1.71818 |
| H | 20.57301  | 4.92319  | -2.16732 |
| H | 18.25278  | 4.04393  | -1.88526 |
| H | 17.77968  | -2.17921 | -0.33996 |
| O | 16.46487  | 1.76433  | -1.12812 |
| C | 20.38283  | -1.20592 | -0.35618 |
| C | 21.77529  | -1.04315 | -0.38313 |
| C | 19.8439   | -2.45437 | 0.00367  |
| N | 22.91551  | -0.91987 | -0.40245 |
| N | 19.41385  | -3.47921 | 0.29916  |
| C | -17.43035 | 1.18707  | -0.74666 |
| C | -18.33552 | 0.17938  | -1.05022 |
| C | -18.19445 | -1.3509  | -1.20451 |
| C | -19.8355  | 0.46444  | -1.29969 |
| C | -19.62768 | -1.92613 | -1.48166 |
| C | -20.54456 | -0.88467 | -1.53122 |
| C | -21.90522 | -1.10251 | -1.75774 |
| C | -22.35211 | -2.4247  | -1.92805 |
| C | -21.43484 | -3.50144 | -1.88129 |
| C | -20.05181 | -3.25988 | -1.664   |
| H | -22.59439 | -0.2862  | -1.80143 |
| H | -23.39256 | -2.61501 | -2.0924  |
| H | -21.79599 | -4.50335 | -2.01184 |
| H | -19.35663 | -4.07612 | -1.63899 |
| H | -17.86398 | 2.16576  | -0.74221 |
| O | -17.1319  | -2.00709 | -1.11747 |
| C | -20.44532 | 1.68227  | -1.31032 |
| C | -21.83209 | 1.75126  | -1.51459 |
| C | -19.71459 | 2.86816  | -1.12146 |
| N | -22.96544 | 1.81296  | -1.68112 |
| N | -19.12987 | 3.84574  | -0.96786 |

**Table S6.** Cartesian coordinates of the optimized structure of **IDF4** molecule at the “MPW1PW91/6-31G (d,p)” level of theory.

---

|   |           |          |          |
|---|-----------|----------|----------|
| C | -2.88067  | 2.94029  | -0.47093 |
| C | -3.83341  | 1.87221  | -0.59665 |
| C | -3.41109  | 0.53884  | -0.54245 |
| C | -2.06053  | 0.29717  | -0.44249 |
| C | -1.14258  | 1.32452  | -0.33879 |
| C | -1.5336   | 2.66714  | -0.34164 |
| H | -4.11808  | -0.26476 | -0.57804 |
| H | -0.81473  | 3.45517  | -0.24646 |
| C | 1.58287   | -2.63911 | -0.17595 |
| C | 2.92752   | -2.91393 | -0.02471 |
| C | 3.87994   | -1.84611 | 0.10619  |
| C | 3.46053   | -0.51233 | 0.03719  |
| C | 2.11026   | -0.2682  | -0.06738 |
| H | 0.86486   | -3.42722 | -0.28109 |
| H | 4.16913   | 0.28968  | 0.07094  |
| N | -1.35204  | -0.99711 | -0.41723 |
| N | 1.39831   | 1.02656  | -0.07217 |
| C | 0.10443   | 0.69904  | -0.23023 |
| C | -0.05477  | -0.67043 | -0.28764 |
| C | 1.19265   | -1.29585 | -0.18257 |
| C | -7.86981  | 1.92356  | -0.79503 |
| C | -7.40575  | 3.1964   | -1.01463 |
| S | -6.52582  | 0.78177  | -0.80676 |
| C | -5.97581  | 3.29695  | -0.99924 |
| H | -8.04888  | 4.03765  | -1.16971 |
| C | -5.34865  | 2.1022   | -0.79903 |
| H | -5.44931  | 4.21876  | -1.12253 |
| C | 7.91244   | -1.90236 | 0.36867  |
| C | 7.4435    | -3.17377 | 0.58359  |
| C | 6.01403   | -3.27253 | 0.54765  |
| C | 5.39129   | -2.07707 | 0.33386  |
| S | 6.57024   | -0.75829 | 0.35575  |
| H | 8.08356   | -4.01575 | 0.74664  |
| H | 5.48467   | -4.19352 | 0.66888  |
| C | 9.26237   | -1.54148 | 0.16544  |
| C | 9.70821   | -0.26101 | -0.01896 |
| S | 10.61541  | -2.66656 | 0.10201  |
| C | 11.13269  | -0.14327 | -0.07901 |
| H | 9.0486    | 0.57684  | -0.10481 |
| C | 11.78138  | -1.34205 | 0.01855  |
| H | 11.63768  | 0.7958   | -0.18378 |
| C | -9.21702  | 1.56013  | -0.57423 |
| C | -9.65804  | 0.27922  | -0.38089 |
| C | -11.08219 | 0.15801  | -0.30644 |
| C | -11.73606 | 1.35368  | -0.40459 |

|   |           |          |          |
|---|-----------|----------|----------|
| S | -10.57312 | 2.68033  | -0.50467 |
| H | -8.99593  | -0.55713 | -0.30192 |
| H | -11.58335 | -0.78172 | -0.19258 |
| C | 2.0143    | 2.35599  | 0.08484  |
| C | 1.99336   | 2.72856  | 1.58857  |
| C | 4.00183   | 4.03948  | 1.6958   |
| C | 4.50396   | 5.46803  | 2.00083  |
| C | 6.37664   | 6.83513  | 2.27565  |
| O | 2.56965   | 4.02617  | 1.81753  |
| O | 5.93365   | 5.51147  | 1.94771  |
| H | 3.02141   | 2.32915  | -0.26992 |
| H | 1.45854   | 3.08069  | -0.46914 |
| H | 2.54498   | 2.00196  | 2.14942  |
| H | 0.97517   | 2.74     | 1.91338  |
| H | 4.42578   | 3.35466  | 2.40356  |
| H | 4.29379   | 3.75251  | 0.70782  |
| H | 4.18258   | 5.74975  | 2.98239  |
| H | 4.09924   | 6.14872  | 1.28104  |
| H | 7.44689   | 6.86608  | 2.27265  |
| H | 5.99818   | 7.52857  | 1.55327  |
| H | 6.01548   | 7.10066  | 3.24838  |
| F | 3.34295   | -4.19854 | -0.00131 |
| F | -3.29875  | 4.22362  | -0.47324 |
| C | -1.98122  | -2.32484 | -0.50635 |
| C | -2.295    | -2.8145  | 0.92134  |
| C | -4.26779  | -4.10275 | 0.45943  |
| C | -4.82312  | -5.54051 | 0.55135  |
| C | -6.70148  | -6.90221 | 0.29623  |
| O | -2.90301  | -4.11683 | 0.91095  |
| O | -6.20039  | -5.56535 | 0.1635   |
| H | -2.88455  | -2.25498 | -1.07322 |
| H | -1.31262  | -3.00897 | -0.98472 |
| H | -2.9621   | -2.12612 | 1.39744  |
| H | -1.37667  | -2.86515 | 1.46401  |
| H | -4.84615  | -3.45661 | 1.08979  |
| H | -4.32256  | -3.75235 | -0.55009 |
| H | -4.73901  | -5.8834  | 1.56202  |
| H | -4.25921  | -6.18142 | -0.0938  |
| H | -7.74123  | -6.92221 | 0.04166  |
| H | -6.16148  | -7.55359 | -0.35958 |
| H | -6.5762   | -7.23076 | 1.30794  |
| C | 13.17315  | -1.54565 | 0.03384  |
| C | 13.74373  | -2.82207 | 0.16933  |
| C | 15.15109  | -2.82127 | 0.07763  |
| C | 15.71948  | -1.54421 | -0.08558 |
| S | 14.44151  | -0.31318 | -0.18606 |
| H | 13.16556  | -3.71223 | 0.32806  |
| H | 15.73556  | -3.71413 | 0.13419  |
| C | -13.13065 | 1.55246  | -0.41122 |
| C | -13.70854 | 2.82609  | -0.54421 |
| C | -15.11617 | 2.8198   | -0.4434  |



|   |           |          |          |
|---|-----------|----------|----------|
| C | -15.67857 | 1.54102  | -0.27532 |
| S | -14.39381 | 0.31659  | -0.17945 |
| H | -13.13543 | 3.71823  | -0.70642 |
| H | -15.70451 | 3.71018  | -0.49781 |
| C | -17.07974 | 1.37793  | -0.21607 |
| C | -17.73775 | 0.19102  | -0.05227 |
| C | -17.18005 | -1.23783 | 0.09999  |
| C | -19.2671  | 0.05131  | 0.01113  |
| C | -18.407   | -2.19323 | 0.19384  |
| C | -19.59243 | -1.45087 | 0.14655  |
| C | -20.85412 | -2.04241 | 0.19888  |
| C | -20.88349 | -3.44712 | 0.26482  |
| C | -19.66915 | -4.19091 | 0.30998  |
| C | -18.41163 | -3.54168 | 0.29087  |
| H | -21.74364 | -1.44111 | 0.17718  |
| H | -17.49333 | -4.08517 | 0.34006  |
| H | -17.67024 | 2.26549  | -0.30749 |
| O | -15.96265 | -1.56148 | 0.13627  |
| C | -20.15461 | 1.08015  | -0.05082 |
| C | -21.52595 | 0.8353   | 0.03527  |
| C | -19.68063 | 2.40017  | -0.20443 |
| N | -22.65208 | 0.67272  | 0.10127  |
| N | -19.30893 | 3.47789  | -0.32847 |
| C | 17.12136  | -1.3868  | -0.13756 |
| C | 17.78664  | -0.20328 | -0.29399 |
| C | 17.24049  | 1.22882  | -0.45032 |
| C | 19.31586  | -0.07263 | -0.34225 |
| C | 18.4731   | 2.17729  | -0.52264 |
| C | 19.65436  | 1.42483  | -0.46845 |
| C | 20.92104  | 2.00617  | -0.50539 |
| C | 20.95744  | 3.39994  | -0.55467 |
| C | 19.75401  | 4.15899  | -0.601   |
| C | 18.48872  | 3.52848  | -0.60569 |
| H | 21.81394  | 1.41089  | -0.48295 |
| H | 17.57694  | 4.08889  | -0.65955 |
| H | 17.70633  | -2.27703 | -0.04494 |
| O | 16.02779  | 1.5619   | -0.50293 |
| C | 20.19378  | -1.10455 | -0.2747  |
| C | 21.56439  | -0.86239 | -0.35047 |
| C | 19.71948  | -2.42256 | -0.12511 |
| N | 22.68726  | -0.6817  | -0.41091 |
| N | 19.35272  | -3.50383 | -0.00317 |
| N | 19.93949  | 5.44096  | -0.6238  |
| N | 22.04566  | 4.09696  | -0.54799 |
| N | -21.9644  | -4.1651  | 0.28198  |
| N | -19.83434 | -5.4764  | 0.36052  |
| S | 21.58631  | 5.71209  | -0.30439 |
| S | -21.48511 | -5.78362 | 0.1005   |

**Table S7.** Cartesian coordinates of the optimized structure of **IDF5** molecule at the “MPW1PW91/6-31G (d,p)” level of theory.

---

|   |           |          |          |
|---|-----------|----------|----------|
| C | -2.88643  | 2.93323  | -0.47999 |
| C | -3.83673  | 1.86457  | -0.60876 |
| C | -3.41191  | 0.52998  | -0.54904 |
| C | -2.06242  | 0.29087  | -0.4362  |
| C | -1.14659  | 1.32058  | -0.3285  |
| C | -1.53798  | 2.66093  | -0.3403  |
| H | -4.11358  | -0.27555 | -0.5954  |
| H | -0.81783  | 3.44794  | -0.24569 |
| C | 1.58651   | -2.6317  | -0.17723 |
| C | 2.93293   | -2.90609 | -0.02001 |
| C | 3.8836    | -1.83826 | 0.11548  |
| C | 3.46173   | -0.50235 | 0.04358  |
| C | 2.11136   | -0.26101 | -0.06522 |
| H | 0.86743   | -3.41834 | -0.28981 |
| H | 4.16536   | 0.30121  | 0.08076  |
| N | -1.35159  | -1.00251 | -0.40725 |
| N | 1.39607   | 1.03218  | -0.06715 |
| C | 0.10229   | 0.69952  | -0.22172 |
| C | -0.05405  | -0.66998 | -0.28177 |
| C | 1.19525   | -1.29118 | -0.181   |
| C | -7.86283  | 1.92106  | -0.81479 |
| C | -7.40514  | 3.19694  | -1.00623 |
| S | -6.52315  | 0.78246  | -0.88477 |
| C | -5.97658  | 3.29971  | -0.99772 |
| H | -8.05246  | 4.03902  | -1.134   |
| C | -5.3488   | 2.09998  | -0.82636 |
| H | -5.4533   | 4.22616  | -1.1088  |
| C | 7.91222   | -1.90095 | 0.38381  |
| C | 7.44592   | -3.17508 | 0.57177  |
| C | 6.01645   | -3.27464 | 0.54263  |
| C | 5.3935    | -2.07461 | 0.35395  |
| S | 6.57106   | -0.76027 | 0.42499  |
| H | 8.0879    | -4.01831 | 0.71526  |
| H | 5.48911   | -4.19956 | 0.64784  |
| C | 9.26157   | -1.5398  | 0.171    |
| C | 9.70908   | -0.26082 | -0.01999 |
| S | 10.61577  | -2.66822 | 0.09521  |
| C | 11.13388  | -0.14708 | -0.09486 |
| H | 9.05164   | 0.58152  | -0.09673 |
| C | 11.78643  | -1.34243 | 0.00323  |
| H | 11.64038  | 0.78696  | -0.21308 |
| C | -9.20438  | 1.55928  | -0.57991 |
| C | -9.64954  | 0.27956  | -0.38285 |
| C | -11.07031 | 0.17145  | -0.29241 |
| C | -11.71449 | 1.36757  | -0.39189 |
| S | -10.55021 | 2.6924   | -0.48629 |
| H | -8.99457  | -0.56412 | -0.31086 |

|   |           |          |          |
|---|-----------|----------|----------|
| H | -11.58164 | -0.76029 | -0.16488 |
| C | 2.00605   | 2.36677  | 0.08853  |
| C | 1.98287   | 2.7336   | 1.59215  |
| C | 3.9904    | 4.0397   | 1.69091  |
| C | 4.50454   | 5.46559  | 1.99961  |
| C | 6.37571   | 6.83024  | 2.26931  |
| O | 2.56041   | 4.02984  | 1.82642  |
| O | 5.93361   | 5.50598  | 1.93717  |
| H | 3.01491   | 2.34805  | -0.27008 |
| H | 1.44742   | 3.09007  | -0.46562 |
| H | 2.53144   | 2.00171  | 2.14765  |
| H | 0.96416   | 2.74592  | 1.9152   |
| H | 4.41749   | 3.34851  | 2.38908  |
| H | 4.27018   | 3.75816  | 0.69787  |
| H | 4.19267   | 5.74516  | 2.98398  |
| H | 4.09714   | 6.15058  | 1.28552  |
| H | 7.44563   | 6.86429  | 2.26156  |
| H | 5.99198   | 7.52502  | 1.55197  |
| H | 6.01883   | 7.09123  | 3.24478  |
| F | 3.35154   | -4.19069 | 0.00812  |
| F | -3.30833  | 4.21654  | -0.49352 |
| C | -1.97615  | -2.33475 | -0.49524 |
| C | -2.28449  | -2.82185 | 0.93429  |
| C | -4.25475  | -4.10365 | 0.4591   |
| C | -4.82348  | -5.53878 | 0.54928  |
| C | -6.69943  | -6.89676 | 0.29063  |
| O | -2.89581  | -4.12328 | 0.92575  |
| O | -6.19817  | -5.55903 | 0.15331  |
| H | -2.88222  | -2.27123 | -1.06364 |
| H | -1.30703  | -3.01857 | -0.97384 |
| H | -2.94585  | -2.12937 | 1.41308  |
| H | -1.36408  | -2.87596 | 1.4746   |
| H | -4.83389  | -3.45105 | 1.08037  |
| H | -4.29569  | -3.75696 | -0.55239 |
| H | -4.7493   | -5.88107 | 1.56031  |
| H | -4.25892  | -6.18378 | -0.09089 |
| H | -7.73774  | -6.91976 | 0.03136  |
| H | -6.15551  | -7.55008 | -0.35897 |
| H | -6.57888  | -7.22052 | 1.30436  |
| C | 13.1894   | -1.53253 | 0.01446  |
| C | 13.77405  | -2.79698 | 0.16343  |
| C | 15.18932  | -2.78618 | 0.06603  |
| C | 15.75445  | -1.49827 | -0.12263 |
| S | 14.4503   | -0.29138 | -0.22847 |
| H | 13.20237  | -3.68811 | 0.32923  |
| H | 15.77684  | -3.6782  | 0.13672  |
| C | -13.10669 | 1.54629  | -0.40719 |
| C | -13.70981 | 2.80484  | -0.53692 |
| C | -15.12184 | 2.76046  | -0.45599 |
| C | -15.64898 | 1.44935  | -0.30563 |
| S | -14.33186 | 0.27328  | -0.19423 |

|   |           |          |          |
|---|-----------|----------|----------|
| H | -13.1543  | 3.71184  | -0.67855 |
| H | -15.73097 | 3.64016  | -0.50768 |
| C | -17.04209 | 1.21178  | -0.26266 |
| C | -17.70656 | 0.00804  | -0.10341 |
| C | -17.26948 | -1.50365 | 0.01788  |
| C | -19.22027 | -0.02281 | 0.00351  |
| C | -18.59852 | -2.35018 | 0.20103  |
| C | -19.65789 | -1.45869 | 0.22553  |
| C | -20.94737 | -1.83078 | 0.44387  |
| C | -21.23702 | -3.1513  | 0.69134  |
| C | -20.22185 | -4.15239 | 0.57163  |
| C | -18.84105 | -3.72318 | 0.32829  |
| H | -21.72575 | -1.10078 | 0.42604  |
| H | -18.03714 | -4.4297  | 0.25354  |
| H | -17.66788 | 2.07894  | -0.36054 |
| O | -16.09554 | -1.9545  | -0.01544 |
| C | -20.07623 | 1.02934  | -0.07544 |
| C | -21.45721 | 0.79818  | 0.01111  |
| C | -19.60753 | 2.33915  | -0.23993 |
| N | -22.58631 | 0.6084   | 0.08196  |
| N | -19.24149 | 3.41541  | -0.37408 |
| C | 17.16947  | -1.3007  | -0.19771 |
| C | 17.83353  | -0.0988  | -0.37559 |
| C | 17.29769  | 1.33565  | -0.55771 |
| C | 19.3719   | 0.03282  | -0.4108  |
| C | 18.53737  | 2.28488  | -0.568   |
| C | 19.71769  | 1.54434  | -0.5196  |
| C | 20.98257  | 2.17042  | -0.54493 |
| C | 21.01177  | 3.57938  | -0.3729  |
| C | 19.7865   | 4.30693  | -0.35582 |
| C | 18.549    | 3.64216  | -0.57841 |
| H | 21.88787  | 1.6046   | -0.66225 |
| H | 17.64671  | 4.19709  | -0.72903 |
| H | 17.78062  | -2.17326 | -0.09555 |
| O | 16.09297  | 1.68242  | -0.66607 |
| C | 20.24341  | -1.01269 | -0.32768 |
| C | 21.62655  | -0.82162 | -0.39086 |
| C | 19.74668  | -2.31347 | -0.165   |
| N | 22.76439  | -0.691   | -0.44096 |
| N | 19.34602  | -3.37918 | -0.03219 |
| O | 19.8012   | 5.72013  | -0.05063 |
| O | 22.25785  | 4.28763  | -0.16952 |
| O | -22.59817 | -3.41517 | 1.06867  |
| O | -20.69142 | -5.53397 | 0.70117  |
| C | 19.86636  | 6.53362  | -1.21546 |
| C | 23.05703  | 4.52671  | -1.33777 |
| C | -19.64402 | -6.50945 | 0.82785  |
| C | -23.01381 | -4.69767 | 0.65066  |
| H | 20.74948  | 6.30169  | -1.76768 |
| H | 19.00523  | 6.35879  | -1.82087 |
| H | 19.89133  | 7.56724  | -0.91786 |

|   |           |          |          |
|---|-----------|----------|----------|
| H | 23.41729  | 3.59583  | -1.72079 |
| H | 22.47884  | 5.0207   | -2.08755 |
| H | 23.89031  | 5.1466   | -1.06521 |
| H | -18.97481 | -6.23345 | 1.60973  |
| H | -20.08321 | -7.46867 | 1.05723  |
| H | -19.11325 | -6.57879 | -0.0955  |
| H | -22.42925 | -5.43823 | 1.14687  |
| H | -24.04846 | -4.82829 | 0.90133  |
| H | -22.88879 | -4.78475 | -0.40603 |

**Table S8.** Cartesian coordinates of the optimized structure of **IDF6** molecule at the “MPW1PW91/6-31G (d,p)” level of theory.

---

|   |          |          |          |
|---|----------|----------|----------|
| C | 3.28396  | -2.77209 | 0.81816  |
| C | 4.12964  | -1.654   | 0.55703  |
| C | 3.60388  | -0.46915 | 0.03088  |
| C | 2.25493  | -0.42391 | -0.21692 |
| C | 1.42372  | -1.49488 | 0.05352  |
| C | 1.9243   | -2.69522 | 0.57887  |
| H | 4.23321  | 0.37111  | -0.17817 |
| H | 1.27971  | -3.52204 | 0.78875  |
| C | -1.59576 | 1.86734  | -1.67119 |
| C | -2.95806 | 1.95085  | -1.89553 |
| C | -3.80727 | 0.83236  | -1.63283 |
| C | -3.2783  | -0.35558 | -1.11781 |
| C | -1.9264  | -0.40663 | -0.88305 |
| H | -0.95075 | 2.69448  | -1.87954 |
| H | -3.90756 | -1.19633 | -0.90849 |
| N | 1.4674   | 0.68934  | -0.77248 |
| N | -1.13767 | -1.5184  | -0.32471 |
| C | 0.13431  | -1.06378 | -0.3105  |
| C | 0.19626  | 0.23171  | -0.79702 |
| C | -1.09416 | 0.66349  | -1.15644 |
| C | 8.0459   | -1.0959  | 1.2332   |
| C | 7.80067  | -2.43742 | 1.2398   |
| S | 6.60636  | -0.19505 | 0.79328  |
| C | 6.43074  | -2.76432 | 1.01852  |
| H | 8.56208  | -3.17161 | 1.40335  |
| C | 5.64413  | -1.67009 | 0.80245  |
| H | 6.06086  | -3.76756 | 1.01416  |
| C | -7.75788 | 0.29417  | -2.27581 |
| C | -7.49184 | 1.63868  | -2.27499 |
| C | -6.11108 | 1.955    | -2.06715 |
| C | -5.3286  | 0.85634  | -1.86431 |
| S | -6.30944 | -0.61064 | -1.85243 |
| H | -8.24365 | 2.38347  | -2.42276 |
| H | -5.73107 | 2.95688  | -2.06293 |
| C | -9.00163 | -0.30499 | -2.56303 |
| C | -9.27151 | -1.63561 | -2.39808 |

|   |           |          |          |
|---|-----------|----------|----------|
| S | -10.42479 | 0.53435  | -3.17488 |
| C | -10.62295 | -1.99966 | -2.69479 |
| H | -8.53778  | -2.3384  | -2.06242 |
| C | -11.39614 | -0.9438  | -3.08465 |
| H | -10.99309 | -3.00033 | -2.60799 |
| C | 9.26818   | -0.50389 | 1.53249  |
| C | 9.53399   | 0.8277   | 1.38358  |
| C | 10.87791  | 1.16535  | 1.66551  |
| C | 11.63638  | 0.10408  | 2.03306  |
| S | 10.67795  | -1.37191 | 2.12791  |
| H | 8.80594   | 1.54653  | 1.07096  |
| H | 11.26387  | 2.16126  | 1.60262  |
| C | -1.68267  | -2.81293 | 0.12339  |
| C | -1.99343  | -2.69625 | 1.63219  |
| C | -3.85409  | -4.18728 | 1.81305  |
| C | -4.29144  | -5.51801 | 2.46384  |
| C | -6.09266  | -6.97727 | 2.81183  |
| O | -2.49123  | -3.93215 | 2.16806  |
| O | -5.67307  | -5.75992 | 2.1845   |
| H | -2.57711  | -3.04572 | -0.42264 |
| H | -0.96206  | -3.58323 | -0.03862 |
| H | -2.72192  | -1.92666 | 1.78992  |
| H | -1.0876   | -2.44671 | 2.13708  |
| H | -4.46666  | -3.39147 | 2.18152  |
| H | -3.95819  | -4.25098 | 0.75035  |
| H | -4.15189  | -5.45772 | 3.52294  |
| H | -3.69903  | -6.31816 | 2.07176  |
| H | -7.12943  | -7.14284 | 2.6062   |
| H | -5.51765  | -7.79246 | 2.42799  |
| H | -5.94708  | -6.90604 | 3.87014  |
| F | -3.49348  | 3.09329  | -2.37139 |
| F | 3.81954   | -3.90963 | 1.30757  |
| C | 2.01398   | 1.99651  | -1.18102 |
| C | 1.95958   | 2.9295   | 0.0448   |
| C | 3.86948   | 4.30255  | -0.37951 |
| C | 4.28299   | 5.75848  | -0.68938 |
| C | 6.10014   | 7.20741  | -1.00142 |
| O | 2.44283   | 4.24519  | -0.26812 |
| O | 5.70949   | 5.85491  | -0.7365  |
| H | 3.02846   | 1.8843   | -1.51641 |
| H | 1.42696   | 2.40209  | -1.97671 |
| H | 2.55456   | 2.51613  | 0.83473  |
| H | 0.94307   | 3.00422  | 0.35864  |
| H | 4.3058    | 3.99736  | 0.54835  |
| H | 4.2092    | 3.65503  | -1.16029 |
| H | 3.91169   | 6.40423  | 0.07874  |
| H | 3.87095   | 6.05282  | -1.63186 |
| H | 7.168     | 7.27028  | -1.0228  |
| H | 5.7053    | 7.51348  | -1.94641 |
| H | 5.7216    | 7.84915  | -0.23263 |
| C | -12.7742  | -0.96651 | -3.39371 |

|   |           |          |          |
|---|-----------|----------|----------|
| C | -13.47779 | 0.20934  | -3.69824 |
| C | -14.8018  | -0.01531 | -4.12379 |
| C | -15.17243 | -1.36798 | -4.18488 |
| S | -13.87177 | -2.37766 | -3.49619 |
| H | -13.04974 | 1.18556  | -3.62195 |
| H | -15.46981 | 0.77838  | -4.39228 |
| C | 12.98124  | 0.19604  | 2.32363  |
| C | 13.78998  | -0.87467 | 2.72911  |
| C | 15.00934  | -0.42236 | 3.28782  |
| C | 15.12932  | 1.00211  | 3.28736  |
| S | 13.89043  | 1.71173  | 2.27291  |
| H | 13.50967  | -1.90814 | 2.64668  |
| H | 15.76103  | -1.09048 | 3.66807  |
| C | 16.21824  | 1.75432  | 4.08011  |
| C | 17.98285  | 3.45819  | 4.47134  |
| C | 17.82205  | 5.0311   | 2.6677   |
| C | 16.69079  | 3.0106   | 3.82672  |
| H | 16.67602  | 1.23524  | 4.88336  |
| O | 18.40976  | 3.01868  | 5.57298  |
| S | 16.1577   | 4.30294  | 2.75582  |
| C | 18.06217  | 6.04678  | 1.77869  |
| N | 18.6964   | 4.38867  | 3.58256  |
| C | 20.22193  | 4.39404  | 3.70024  |
| H | 20.48323  | 3.51511  | 4.25528  |
| H | 20.63271  | 4.36224  | 2.72056  |
| C | 17.08653  | 6.37023  | 0.79414  |
| C | 19.25244  | 6.82497  | 1.80516  |
| N | 16.27534  | 6.61698  | 0.00084  |
| N | 20.18949  | 7.47899  | 1.78213  |
| C | 20.85613  | 5.62135  | 4.40323  |
| H | 21.93617  | 5.48646  | 4.41705  |
| H | 20.61827  | 6.50062  | 3.86137  |
| H | 20.51002  | 5.71078  | 5.41202  |
| C | -16.43753 | -1.69356 | -4.75088 |
| C | -18.39319 | -2.98362 | -5.64349 |
| C | -17.87255 | -5.29847 | -5.4659  |
| C | -17.05209 | -2.90044 | -4.91105 |
| H | -16.9943  | -0.86816 | -5.12112 |
| O | -19.11588 | -1.97828 | -5.8498  |
| S | -16.59423 | -4.52283 | -4.45926 |
| C | -17.91104 | -6.65806 | -5.49055 |
| N | -18.70542 | -4.35326 | -6.12088 |
| C | -19.74257 | -4.50236 | -7.25163 |
| H | -19.88857 | -3.51978 | -7.66723 |
| H | -19.3571  | -5.16885 | -7.97525 |
| C | -16.79216 | -7.34901 | -4.93801 |
| C | -18.99208 | -7.40958 | -5.97966 |
| N | -15.88744 | -7.90771 | -4.49123 |
| N | -19.85795 | -8.06311 | -6.37021 |
| C | -21.13827 | -5.05798 | -6.82724 |
| H | -21.76668 | -5.1266  | -7.71175 |

|   |           |          |          |
|---|-----------|----------|----------|
| H | -21.01466 | -6.02603 | -6.40753 |
| H | -21.61625 | -4.41489 | -6.11565 |

---
